1 December 14<sup>th</sup>, 2021

2 **Evidence for a mouse origin of the SARS-CoV-2 Omicron variant**

3 Changshuo Wei,<sup>1,2,3</sup> Ke-Jia Shan,<sup>1,2,3</sup> Weiguang Wang,<sup>1,2,3</sup> Shuya Zhang,<sup>1,2</sup> Qing Huan,<sup>1,\*</sup>  
4 and Wenfeng Qian<sup>1,2,\*</sup>

5

6 <sup>1</sup> State Key Laboratory of Plant Genomics, Institute of Genetics and Developmental  
7 Biology, Innovation Academy for Seed Design, Chinese Academy of Sciences, Beijing  
8 100101, China

9 <sup>2</sup> University of Chinese Academy of Sciences, Beijing 100049, China

10 <sup>3</sup> These authors contributed equally to this work

11 \* Correspondence: [qhuan@genetics.ac.cn](mailto:qhuan@genetics.ac.cn) (Q.H.) or [wfqian@genetics.ac.cn](mailto:wfqian@genetics.ac.cn) (W.Q.)

12

13 **ABSTRACT**

14 The rapid accumulation of mutations in the SARS-CoV-2 Omicron variant that enabled  
15 its outbreak raises questions as to whether its proximal origin occurred in humans or  
16 another mammalian host. Here, we identified 45 point mutations that Omicron acquired  
17 since divergence from the B.1.1 lineage. We found that the Omicron spike protein  
18 sequence was subjected to stronger positive selection than that of any reported SARS-  
19 CoV-2 variants known to evolve persistently in human hosts, suggesting the possibility of  
20 host-jumping. The molecular spectrum (*i.e.*, the relative frequency of the twelve types of  
21 base substitutions) of mutations acquired by the progenitor of Omicron was significantly  
22 different from the spectrum for viruses that evolved in human patients, but was highly  
23 consistent with spectra associated with evolution in a mouse cellular environment.  
24 Furthermore, mutations in the Omicron spike protein significantly overlapped with  
25 SARS-CoV-2 mutations known to promote adaptation to mouse hosts, particularly  
26 through enhanced spike protein binding affinity for the mouse cell entry receptor.  
27 Collectively, our results suggest that the progenitor of Omicron jumped from humans to  
28 mice, rapidly accumulated mutations conducive to infecting that host, then jumped back  
29 into humans, indicating an inter-species evolutionary trajectory for the Omicron outbreak.

30 **Keywords:** SARS-CoV-2; Omicron; evolutionary origin; molecular spectrum of  
31 mutations; spike protein; ACE2

## 32 INTRODUCTION

33 The coronavirus disease 2019 (COVID-19) pandemic, caused by the SARS-CoV-2 RNA  
34 virus, has led to significant illness and death worldwide. The SARS-CoV-2 Omicron  
35 variant was first reported in South Africa on November 24<sup>th</sup>, 2021, and was designated as  
36 a variant of concern (VOC) within two days by the World Health Organization (WHO)  
37 based on the increase in infections attributable to this variant in South Africa (*i.e.*,  
38 Omicron outbreak). In addition, the open reading frame encoding the spike protein (ORF  
39 S) of Omicron harbors an exceptionally high number of mutations. These mutations are  
40 particularly relevant to SARS-CoV-2 infection characteristics because the spike protein is  
41 well-known to mediate viral entry into the host cell by interacting with angiotensin-  
42 converting enzyme 2 (ACE2) on the cell surface (Zhou et al., 2020). In addition, the  
43 spike protein is also a target for vaccine development and antibody-blocking therapy  
44 (Huang et al., 2020; Martinez-Flores et al., 2021).

45 The proximal origins of Omicron have quickly become a controversial topic of heated  
46 debate in the scientific and public health communities (Callaway, 2021; Kupferschmidt,  
47 2021). Many mutations detected in Omicron were rarely reported among previously  
48 sequenced SARS-CoV-2 variants (Shu and McCauley, 2017; Hadfield et al., 2018),  
49 leading to three prevalent hypotheses regarding its evolutionary history. The first  
50 hypothesis is that Omicron could have “cryptically spread” and circulated in a population  
51 with insufficient viral surveillance and sequencing. Second, Omicron could have evolved  
52 in a chronically infected COVID-19 patient, such as an immunocompromised individual  
53 who provided a suitable host environment conducive to long-term virus adaptation. The  
54 third possibility is that Omicron could have accumulated mutations in a nonhuman host  
55 and then jumped into humans. Currently, the second scenario represents the most popular  
56 hypothesis regarding the proximal origins of Omicron (Callaway, 2021; Kupferschmidt,  
57 2021).

58 The first two hypotheses assume that Omicron acquired these mutations in humans  
59 (collectively to as “human origin hypothesis” hereafter), while the third assumes that  
60 Omicron acquired mutations in a nonhuman species. Based on our previous work in viral

61 evolution, we hypothesized that the host species in which Omicron acquired its particular  
62 set of mutations could be determined by analyzing the molecular spectra of mutations  
63 (*i.e.*, the relative frequency of the twelve types of base substitutions). In previous work,  
64 we showed that *de novo* mutations in RNA virus genomes are generated in a replication-  
65 independent manner and are highly dependent on mutagenic mechanisms specific to the  
66 host cellular environment, resulting in overrepresentation with specific mutation types.  
67 For example, reactive oxygen species (ROS) can oxidize guanine to 8-oxoguanine and  
68 thereby induce the G>U transversion (Li et al., 2006; Kong and Lin, 2010), while  
69 cytidine deaminases can induce RNA editing such as C>U transitions (Blanc and  
70 Davidson, 2010; Harris and Dudley, 2015). Consistent with this phenomenon, viruses  
71 belonging to different orders (*e.g.*, poliovirus, Ebola virus, and SARS-CoV-2) were found  
72 to exhibit similar molecular spectra of mutations when evolving in the same host species,  
73 while members of the same virus species exhibit divergent molecular spectra when  
74 evolving in different host species (Shan et al., 2021). Since *de novo* mutations can thus  
75 strongly influence the molecular spectrum of mutations that accumulate during virus  
76 evolution in a host-specific manner, the host species in which Omicron acquired its  
77 mutations could be determined by analyzing information carried by the mutations  
78 themselves.

79 In this study, we identified mutations acquired by Omicron before its outbreak, and tested  
80 whether the molecular spectrum of these mutations was consistent with the cellular  
81 environment of human hosts. Prominent dissimilarities were observed between the  
82 molecular spectrum of Omicron and a relatively comprehensive set of molecular spectra  
83 from variants known to have evolved in humans, including those of three isolates from  
84 chronic SARS-CoV-2 patients. Therefore, we next examined the molecular spectra of  
85 mutations obtained from a wide range of host mammals for comparison with that of  
86 Omicron. Finally, we used molecular docking-based analyses to investigate whether the  
87 mutations in the Omicron spike protein could be associated with adaptation to the host  
88 species inferred from molecular spectrum analysis. Our study provides insight into the  
89 evolutionary trajectory and proximal origins of Omicron through careful scrutiny of its  
90 mutations, and suggests strategies for avoiding future outbreaks caused by potentially  
91 dangerous SARS-CoV-2 variants.

92

## 93 **RESULTS**

### 94 **Over-representation of nonsynonymous mutations in Omicron ORF *S* suggests** 95 **strong positive selection**

96 To first identify mutations that accumulated in the SARS-CoV-2 genome prior to the  
97 Omicron outbreak, we constructed a phylogenetic tree that included the genomic  
98 sequences of the reference SARS-CoV-2, two variants in the B.1.1 lineage which were  
99 genetically close to Omicron, and 48 Omicron variants sampled before November 15<sup>th</sup>,  
100 2021 (**Fig. 1A**). These two B.1.1 variants were sampled during April 22<sup>nd</sup>–May 5<sup>th</sup>, 2020,  
101 which suggested that the progenitor of Omicron diverged from the B.1.1 lineage roughly  
102 in mid-2020. Intermediate versions have gone largely undetected, thus resulting in an  
103 exceptionally long branch leading to the most recent common ancestor (MRCA) of  
104 Omicron in the phylogenetic tree (**Fig. 1A**). We hereafter refer to this long branch as  
105 Branch O.

106 We identified 45 point mutations that were introduced in Branch O (hereafter referred to  
107 as “pre-outbreak Omicron mutations”; **Fig. 1A**). Visual assessment suggested that the  
108 pre-outbreak Omicron mutations were over-represented in ORF *S* (**Fig. 1B**). To test if the  
109 rate at which mutations accumulated in ORF *S* was accelerated in Branch O, we  
110 randomly sampled one SARS-CoV-2 variant per day since December 24<sup>th</sup>, 2019 from the  
111 Global Initiative on Sharing All Influenza Data (GISAID) (Shu and McCauley, 2017) to  
112 compare mutation accumulation rates among different variants. We found that mutations  
113 accumulated in ORF *S* at a rate of ~0.45 mutations per month on average. In sharp  
114 contrast, 27 mutations accumulated in ORF *S* in Branch O during the 18 months spanning  
115 May 2020–November 2021, equivalent to ~1.5 mutations per month, or ~3.3 times faster  
116 than the average rate of other variants (**Fig. 1C**).

117 Counting mutations across the whole SARS-CoV-2 genome indicated that Omicron  
118 acquired mutations in the genome at a similar rate to other variants (**Fig. 1D**), suggesting  
119 that the accelerated evolutionary rate of ORF *S* could not be explained by an overall

120 elevated mutation rate in Omicron progenitors. In light of these findings, we  
121 hypothesized that positive selection could have helped accelerate the evolutionary rate of  
122 ORF *S*. To test this hypothesis, we sought to infer the strength of positive selection by  
123 estimating the ratio of nonsynonymous to synonymous mutations. Twenty-six of the 27  
124 pre-outbreak mutations in the ORF *S* of Omicron were nonsynonymous (**Fig. 1E**),  
125 resulting in a  $d_N/d_S$  ratio of 6.64, significantly greater than a  $d_N/d_S$  of 1.00 ( $P = 0.03$ ,  
126 Fisher's exact test). These results indicated that positive selection contributed to  
127 increasing the mutation rate in ORF *S* in Branch O.

128 To test if such a level of positive selection is common among SARS-CoV-2 variants, we  
129 counted the number of nonsynonymous and synonymous mutations in ORF *S* in other  
130 SARS-CoV-2 VOC lineages (*i.e.*, Alpha, Beta, Gamma, and Delta) as well as in the  
131 genomes of SARS-CoV-2 variants isolated from three chronically infected patients  
132 (Kemp et al., 2021; Truong et al., 2021). None of these other VOCs or isolates exhibited  
133 comparable numbers of nonsynonymous mutations as that of mutations in Branch O (**Fig.**  
134 **1E**). These observations strongly suggested that the Omicron variant had undergone a  
135 strong positive selection for the spike protein that no other known SARS-CoV-2 variants  
136 evolved in humans had been subjected to. Considering that the spike protein determines  
137 the host range of a coronavirus (*i.e.*, which organisms it can infect), we therefore  
138 hypothesized that the progenitor of Omicron might host-jump from humans to a  
139 nonhuman species because this process would require substantial mutations in the spike  
140 protein for rapid adaptation to a new host.

141

### 142 **The molecular spectrum of pre-outbreak Omicron mutations is inconsistent with an** 143 **evolutionary history in humans**

144 Previous studies showed that the molecular spectrum of mutations that accumulate in a  
145 viral genome reflect a host-specific cellular environment (Deng et al., 2021; Shan et al.,  
146 2021). To test the human origin hypothesis of Omicron, we compared the molecular  
147 spectrum of the 45 pre-outbreak Omicron mutations with the “standard” molecular  
148 spectrum for SARS-CoV-2 variants known to have evolved strictly in humans (hereafter

149 referred to as “the hSCV2 spectrum”, **Fig. 2A**). The hSCV2 spectrum included 6,986  
150 point mutations that were compiled from 34,853 high-quality sequences of SARS-CoV-2  
151 variants isolated from patients worldwide (Shan et al., 2021). We found that the  
152 molecular spectrum of the pre-outbreak Omicron mutations was significantly different  
153 from the hSCV2 spectrum ( $P = 0.004$ ,  $G$ -test, **Fig. 2B**). In particular, transitions were  
154 more abundant than transversions and C>U mutation was more abundant than its  
155 complementary mutation G>A, as in the hSCV2 spectrum; However, a hallmark of RNA  
156 virus mutations when evolving in humans—a higher rate of G>U mutation than its  
157 complementary mutation C>A (Panchin and Panchin, 2020; De Maio et al., 2021; Deng  
158 et al., 2021; Shan et al., 2021), likely caused by cellular ROS—was absent in the pre-  
159 outbreak Omicron mutations.

160 To exclude the possibility that this apparent difference in the molecular spectrum was  
161 caused by the relatively small number of pre-outbreak Omicron mutations, we generated  
162 100 “pseudo” variants *in silico* by randomly down sampling 45 mutations from the  
163 hSCV2 spectrum. None of the pseudo variants showed smaller  $P$  values (based on  $G$ -  
164 tests) than that obtained using the pre-outbreak Omicron mutations (**Fig. 2C**), nor did the  
165 SARS-CoV-2 isolates with mutations known to be acquired in the three chronically  
166 infected patients (# of mutations are 30, 47, and 81, **Fig. 2C**). These observations  
167 indicated that the difference between the molecular spectrum of pre-outbreak Omicron  
168 mutations and the hSCV2 spectrum could not be strictly attributed to statistical  
169 randomness.

170 To exclude the possibility that some mutations which occurred early in the evolution of  
171 Omicron distorted the molecular spectrum of mutations that accumulated afterward, we  
172 identified 120 point mutations on top of the MRCA of Omicron, by screening 695  
173 Omicron variants collected spanning November 8<sup>th</sup>–December 7<sup>th</sup>, 2021 (hereafter  
174 referred to as “post-outbreak Omicron mutations”). The molecular spectrum of these  
175 post-outbreak Omicron mutations was not significantly different from the hSCV2  
176 spectrum (**Fig. 2B–C**). This finding indicated that Omicron acquired mutations following  
177 the same molecular spectrum as other SARS-CoV-2 variants during its evolution in

178 human hosts. Collectively, these molecular spectrum analyses revealed that pre-outbreak  
179 Omicron mutations were unlikely to have been acquired in humans.

180

### 181 **The molecular spectrum of pre-outbreak Omicron mutations is consistent with an** 182 **evolutionary history in mice**

183 In light of our findings that Omicron may have evolved in another host before its  
184 outbreak, we next sought to determine the nonhuman host species in which these  
185 mutations accumulated. To this end, we first characterized the molecular spectra of  
186 coronaviruses that evolved in different host species for comparison with that of Omicron.  
187 Specifically, we retrieved 17 sequences of murine hepatitis viruses, 13 canine  
188 coronaviruses, 54 feline coronaviruses, 23 bovine coronaviruses, and 110 porcine  
189 deltacoronaviruses (**Table S1**), constructed the phylogenetic tree for the coronaviruses  
190 isolated from each host species (canine coronavirus as an example shown in **Fig. 3A** and  
191 the rest are shown in **Fig. S1**), and identified the mutations that accumulated in each  
192 branch (**Fig. 3A**). We also included some previously reported molecular spectra (Shan et  
193 al., 2021), including 17 spectra of mutations acquired by SARS-CoV-, SARS-CoV-2-,  
194 and MERS-CoV-related coronaviruses during their evolution in bats, two spectra of  
195 camel MERS-CoV, one spectrum estimated from 807 MERS-CoV mutations  
196 accumulated in human (the hMERS spectrum), as well as the hSCV2 spectrum.  
197 Furthermore, we also included the molecular spectrum of mutations identified in an early  
198 variant of each of the other four VOCs.

199 We performed principal component analysis to reduce the dimensionality of the  
200 molecular spectrum of mutations, and subsequently visualized the data using the first two  
201 principal components (**Fig. 3B**). Consistent with the results of our previous study (Shan  
202 et al., 2021), drawing 95% confidence ellipses for each host species showed that the  
203 molecular spectra clustered according to their respective hosts (**Fig. 3B**), likely because  
204 viruses evolving in the same host species share the mutagens specific to that host's  
205 cellular environment. Supporting this point, the molecular spectrum of post-outbreak  
206 Omicron mutations (which are known to have accumulated in humans) was located



207 within the human 95% confidence ellipse. In contrast, the molecular spectrum of pre-  
208 outbreak Omicron mutations was within the mouse ellipse, suggesting that the pre-  
209 outbreak mutations accumulated in a rodent (in particular mouse) host.

210

## 211 **Pre-outbreak Omicron mutations in the spike protein significantly overlap with** 212 **mutations in mouse-adapted SARS-CoV-2**

213 Mice were previously reported to serve as poor hosts for SARS-CoV-2 because the spike  
214 protein of early SARS-CoV-2 variants exhibit low-affinity interactions with mouse ACE2  
215 (Lam et al., 2020; Zhou et al., 2020; Ren et al., 2021; Wong et al., 2021). However, over  
216 the course of the pandemic SARS-CoV-2 variants emerged that could infect mice. For  
217 example, variants harboring the spike mutation N501Y, which are relatively common in  
218 human patients (24.7%), could infect mice (Gu et al., 2020; Leist et al., 2020; Sun et al.,  
219 2021). If the progenitor of Omicron indeed evolved in a mouse species before the  
220 Omicron outbreak, we postulated that its spike protein likely adapted through increased  
221 binding affinity for mouse ACE2. To test this possibility, we projected the pre-outbreak  
222 Omicron mutations in the spike protein onto a three-dimensional structural model of the  
223 spike:ACE2 complex (Lan et al., 2020). Seven mutations (*i.e.*, K417N, G446S, E484A,  
224 Q493R, G496S, Q498R, and N501Y) were located at the interface of ACE2 and the  
225 receptor-binding domain (RBD) of the spike protein and could potentially affect their  
226 interactions (**Fig. 4A**).

227 Previous studies of SARS-CoV-2 variants isolated from mice reported specific amino  
228 acid mutations in the spike protein that could promote its interactions with mouse ACE2  
229 (Leist et al., 2020; Wu et al., 2020b; Huang et al., 2021; Montagutelli et al., 2021; Sun et  
230 al., 2021; Wong et al., 2021; Zhang et al., 2021). In addition, previous studies have  
231 described some reverse zoonotic events (*e.g.*, from humans to other mammals such as  
232 mink and white-tailed deer) for SARS-CoV-2 (Chandler et al., 2021; Oude Munnink et  
233 al., 2021), and the variants isolated from these mammalian hosts presumably harbored  
234 amino acid mutations that could potentially participate in their adaptation to these hosts.  
235 Thus, if the progenitor of Omicron evolved in mice and adapted to mouse ACE2, we

236 predicted that the pre-outbreak Omicron mutations should share considerable overlap  
237 with the mutations identified in these mouse-adapted SARS-CoV-2 variants, but not  
238 those of other mammalian species.

239 To test this prediction, we identified the mutations in ORF *S* of SARS-CoV-2 variants  
240 isolated from 15 mammalian species (*e.g.*, mice, cats, dogs, minks, and deer, **Table S2**)  
241 and found that pre-outbreak Omicron mutations tended to share the same positions as the  
242 ORF *S* mutations identified in mice (odds ratio = 231.4,  $P = 1.6 \times 10^{-11}$ , Fisher's exact  
243 test, **Fig. 4B–C**). In contrast, same statistical test showed much lower odds ratios and  
244 significance levels for overlap in these mutations with other species (**Fig. 4C**). Pre-  
245 outbreak Omicron mutations also overlapped with some mutations detected in isolates  
246 from chronically infected patients (Kemp et al., 2021; Truong et al., 2021), although they  
247 too showed substantially lower odds ratios and significance levels (**Fig. 4C**). These  
248 observations implied that the pre-outbreak Omicron mutations in ORF *S* promoted its  
249 adaptation to a mouse host.

250 We then conducted enrichment analysis for each of the seven mouse-adapted SARS-  
251 CoV-2 variants and observed statistical significance for all these variants (**Fig. 4D**). In  
252 particular, we observed amino acid mutations at residues 493 and 498 in five and six of  
253 the seven mouse-adapted SARS-CoV-2 variants, respectively (**Fig. 4D**). Identical amino  
254 acid mutations (*i.e.*, Q493R and Q498R) were both observed in two variants  
255 (Montagutelli et al., 2021; Wong et al., 2021), and considering that these two amino acid  
256 mutations are uncommon in human patients infected by non-Omicron SARS-CoV-2  
257 variants (0.005% and 0.002%, respectively) we concluded that the progenitor of Omicron  
258 evolved in mouse species (or at least rodent species).

259

## 260 **Pre-outbreak Omicron mutations in the spike protein significantly enhance binding** 261 **affinity with mouse ACE2**

262 To investigate the mechanisms by which the pre-outbreak Omicron mutations in the spike  
263 protein could have contributed to its adaptation to a mouse host, we examined their

264 interaction through molecular docking analysis of the spike protein RBD and mouse  
265 ACE2 (**Fig. 5A**). Following previous studies (Lam et al., 2020; Rodrigues et al., 2020),  
266 we estimated the HADDOCK score (van Zundert et al., 2016), which is positively  
267 associated with the dissociation constant ( $K_D$ , with smaller  $K_D$  indicating stronger  
268 binding) of protein interactions (Kastritis and Bonvin, 2010), and can be used to predict  
269 the susceptibility of a mammalian species to infection with SARS-CoV-2 (Rodrigues et  
270 al., 2020).

271 To confirm the accuracy of inferences regarding the binding affinity between spike  
272 protein RBD and ACE2 based on the HADDOCK score, we calculated the HADDOCK  
273 score for eight experimentally determined  $K_D$  values between four RBD variants and  
274 human (or mouse) ACE2 (Sun et al., 2021). The HADDOCK scores were positively  
275 correlated with the  $K_D$  values in the analysis (Pearson's correlation coefficient  $r = 0.93$ ,  $P$   
276  $= 0.002$ , **Fig. S2A–C**), thus supporting the validity of molecular docking-based  
277 predictions of ACE2-binding affinity for other RBD variants.

278 The molecular docking-based predictions suggested that the RBD of Omicron exhibited  
279 higher binding affinity for mouse ACE2 than that of RBD encoded in the reference  
280 SARS-CoV-2 genome, further suggesting an evolutionary history in mice (**Fig. 5B**). And  
281 as expected, the mutations detected in the RBD of the other four VOCs of SARS-CoV-2  
282 as well as those of variants isolated from chronically infected human patients showed no  
283 apparent changes in their binding affinity for mouse ACE2 compared with the reference  
284 RBD (**Fig. 5B**).

285 Since five amino acid mutations were shared between Omicron and mouse-adapted  
286 SARS-CoV-2 variants in RBD (*i.e.*, K417N, E484A, Q493R, Q498R, and N501Y; **Fig.**  
287 **4B**), and that they together enhanced RBD binding affinity for mouse ACE2 (**Fig. 5B**),  
288 we next determined the individual effects of each of these five mutations. Notably, only  
289 Q493R and Q498R significantly increased the binding affinity with mouse ACE2, which  
290 was consistent with their repeated detection in mouse-adapted SARS-CoV-2 variants  
291 (Montagutelli et al., 2021; Wong et al., 2021). Indeed, docking analysis showed that  
292 Q493R/Q498R double mutation could further increase the RBD binding affinity for

293 mouse ACE2 (**Fig. 5B**). By contrast, the other three mutations showed no significant  
294 effects on the binding affinity between RBD and mouse ACE2, neither in the reference  
295 RBD nor in the Q493R/Q498R double mutant (**Fig. 5B**), suggesting that they did not  
296 contribute to the enhanced interaction between Omicron RBD and mouse ACE2. Indeed,  
297 previous studies showed that K417N, E484K, and N501Y were related to escape from  
298 neutralizing antibodies (Li et al., 2021; Nelson et al., 2021).

### 299 **Mice as the most likely rodent species in which the progenitor of Omicron evolved**

300 While the observations regarding both the molecular spectrum of mutations and the  
301 RBD-ACE2 interaction suggested that mice were candidate host species in which the  
302 progenitor of Omicron evolved, it remained plausible that Omicron evolved in some  
303 other rodent species with similar cellular mutagen environment and ACE2 structure to  
304 mice. We postulated that if Omicron evolved in another rodent species, the amino acid  
305 mutations in Omicron RBD should elevate its interaction with the ACE2 of this host. To  
306 test this prediction, we applied molecular docking analysis to four additional rodent  
307 species representing different lineages of rodents (Kumar et al., 2017)—brown rats  
308 (*Rattus norvegicus*), guinea pigs (*Cavia porcellus*), golden hamsters (*Mesocricetus*  
309 *auratus*), and Daurian ground squirrels (*Spermophilus dauricus*)—as well as a close  
310 relative of rodents, European rabbits (*Oryctolagus cuniculus*). Omicron RBD showed  
311 higher ACE2-binding affinity (compared with the reference RBD) only to the mouse  
312 ACE2 (**Fig. 5C**), suggesting that mice are the most likely host species in which the  
313 progenitor of Omicron evolved.

## 314 **DISCUSSION**

315 In this study, we used the molecular spectrum of mutations of the SARS-CoV-2 Omicron  
316 variant to trace its proximal host origins. We found that the molecular spectrum of pre-  
317 outbreak Omicron mutations was inconsistent with the rapid accumulation of mutations  
318 in humans, but rather suggested a trajectory in which the progenitor of Omicron  
319 experienced a reverse zoonotic event from humans to mice sometime during the  
320 pandemic (most likely in mid-2020) and accumulated mutations in a rodent host (most  
321 likely mouse) for more than one year before jumping back to humans in late-2021. While  
322 evolving in mice, the progenitor of Omicron adapted to the mouse host by acquiring  
323 amino acid mutations in the spike protein that increased its binding affinity with mouse  
324 ACE2. In addition, mutations associated with immune escape also accumulated, which  
325 may also be a contributing factor in its rapid spread.

326 While we show a phylogenetically long branch leading to the MRCA of current Omicron  
327 variants (*i.e.*, Branch O), it is worth noting that intermediate versions of Omicron were  
328 occasionally reported. For example, a SARS-CoV-2 variant (EPI\_ISL\_7136300) was  
329 collected by the Utah Public Health Laboratory on December 1<sup>st</sup>, 2021 which harbored 32  
330 of the 45 pre-outbreak Omicron mutations. However, the 13 mutations absent in this  
331 variant clustered within residues 371–501 of the spike protein (**Fig. S3**). The absence of  
332 these spike protein mutations thus suggested that this variant was a product of  
333 recombination between an Omicron variant and another SARS-CoV-2 variant, rather than  
334 a direct progenitor of Omicron. Considering the large number of pre-outbreak Omicron  
335 mutations (45) combined with the sparsity of intermediate versions identified to date, this  
336 long branch leading to Omicron in our phylogenetic reconstruction remains valid.

337 Although we primarily focused on point mutations because the molecular spectrum of  
338 these mutations can reflect the host cellular environment (Deng et al., 2021; Shan et al.,  
339 2021), we also used the information of deletions and insertions to infer the evolutionary  
340 trajectory of Omicron. For example, a B.1.1 variant (EPI\_ISL\_493480) shared the same  
341 deletion ( $\Delta$ 105–107 in non-structural protein 6) as the Omicron variants, which was used  
342 to infer that B.1.1 is a close relative of Omicron. In addition, spike  $\Delta$ 69–70 deletion is

343 shared by Omicron and many non-Omicron variants isolated from patients (Meng et al.,  
344 2021), but is absent in the early samples of SARS-CoV-2 (Wu et al., 2020a), strongly  
345 suggesting that the progenitor of Omicron was jumped from humans to mice during the  
346 pandemic.

347

348 In addition, we noted that Omicron harbored a nine nucleotide insertion (GAGCCAGAA,  
349 encoding the peptide EPE) after residue 214 in the spike protein. This insertion is  
350 identical to the sequence of *TMEM245* in the human genome or that of ORF *S* in the  
351 human coronavirus hCoV-229E, which was used as evidence to support a human origin  
352 for Omicron (Venkatakrisnan et al., 2021). However, we provide a simpler explanation  
353 for this insertion, namely that it was derived from an RNA fragment of ORF *N* in the  
354 SARS-CoV-2 genome (**Fig. S4**). We believe that the insertion of an ORF *N* fragment is  
355 more likely because the RNA abundance of ORF *N* is much higher than that of mRNA  
356 encoded by the human genome (Wei et al., 2021). That is, in SARS-CoV-2-infected cells,  
357 a substantial proportion of RNAs are viral, and especially so for ORF *N* due to the nested  
358 nature of the coronavirus genome and subgenomes (Kim et al., 2020).

359 It also warrants mention that all of the mouse-adapted SARS-CoV-2 variants were  
360 amplified/purified in Vero cells (a cell line originally isolated from the kidney of green  
361 monkey) at some stage of experimentation, which could impose an additional selection  
362 pressure to enhance the spike protein binding affinity towards primate ACE2 (Leist et al.,  
363 2020; Wu et al., 2020b; Huang et al., 2021; Montagutelli et al., 2021; Sun et al., 2021;  
364 Wong et al., 2021; Zhang et al., 2021). Consistent with this experimental process, the  
365 amino acid mutations acquired by Omicron and mouse-adapted viruses were not always  
366 identical, even if mutations occurred at the same residue. For example, Q493H and  
367 Q493K were also detected in the mouse-adapted SARS-CoV-2 at residue 493 of the spike  
368 protein, in addition to mutations observed in Omicron (Q493R). Different from the  
369 effects of Q493R, these two mutations increased the binding affinity toward both mouse  
370 and human ACE2 (**Fig. S2C**), indicating that SARS-CoV-2 could potentially evolve  
371 remarkably high diversity in its adaptation to ACE2 from various host species. Consistent

372 with this possibility, numerous mutations were also identified in the spike protein of  
373 SARS-CoV-2 RNA fragment amplified from wastewater samples (Smyth et al., 2021).

374 Humans represent the largest known reservoir of SARS-CoV-2. Our study suggests that  
375 SARS-CoV-2 could have spilled over from humans to wild animals, and that the variants  
376 which successfully infected animal hosts could then accumulate new mutations before  
377 jumping back into humans as a variant of concern. Given the ability of SARS-CoV-2 to  
378 jump across various species, it appears likely that global populations will face additional  
379 animal-derived variants until the pandemic is well under control. Viral surveillance and  
380 sequencing in wild animals will likely help to prevent future outbreaks of dangerous  
381 SARS-CoV-2 variants.



## 382 **METHODS**

### 383 **Identification of pre-outbreak and post-outbreak Omicron mutations**

384 Genomic sequences of 695 SARS-CoV-2 Omicron variants were downloaded from  
385 GISAID (<https://www.gisaid.org/>) on December 7th, 2021. The reference genome of  
386 SARS-CoV-2 (EPI\_ISL\_402125) and two variants in the B.1.1 lineage (EPI\_ISL\_698296  
387 and EPI\_ISL\_493480) were also downloaded from GISAID.

388 The genomes of SARS-CoV-2 variants were aligned by MUSCLE v3.8.1551 (Edgar,  
389 2004). The phylogenetic tree and ancestral sequences were reconstructed using FastML  
390 v3.11 (Ashkenazy et al., 2012) with default parameters. The single-nucleotide  
391 substitutions obtained by the most recent common ancestor (MRCA) of Omicron variants  
392 after its divergence from the B.1.1 lineage were defined as pre-outbreak Omicron  
393 mutations. To detect the post-outbreak Omicron mutations, the sequences of 695  
394 Omicron variants were aligned to the Omicron's MRCA sequence, and sequences with  
395 >10 single-nucleotide substitutions were discarded. The single-nucleotide substitutions  
396 detected in at least two variants were defined as the post-outbreak Omicron mutations.

397 The numbers of synonymous and nonsynonymous sites in ORF *S* of SARS-CoV-2 were  
398 estimated by PAML in a previous study (Wei et al., 2021). Briefly,  $d_N$  was calculated as  
399 the ratio between the number of nonsynonymous mutations and the number of  
400 nonsynonymous sites, while  $d_S$  was calculated as the ratio between the number of  
401 synonymous mutations and the number of synonymous sites.

402 The frequencies of three mutations (Q493R, Q498R, and N501Y) among patients were  
403 retrieved from CoV-GLUE-Viz (<http://cov-glue-viz.cvr.gla.ac.uk/>) updated at November  
404 23<sup>th</sup>, 2021.

### 405 **Comparison between the sequence evolutionary rate of Omicron and other SARS-** 406 **CoV-2 variants**

407 A total of 764 variant sequences were randomly sampled from the SARS-CoV-2 genomic  
408 sequences deposited at GISAID, one variant each day since COVID-19 outbreak. The  
409 progenitors of other four VOCs (Alpha, Beta, Gamma, and Delta) were retrieved from



410 Nextstrain (<https://nextstrain.org/>) (Hadfield et al., 2018). Single-nucleotide substitutions  
411 (relative to the reference genome) of each variant were defined as the mutations acquired  
412 by the SARS-CoV-2 variant. The single-nucleotide base substitutions of three chronically  
413 infected patients were retrieved from two previous studies (Kemp et al., 2021; Truong et  
414 al., 2021). The mutations with allele frequency >50% on the final monitored day were  
415 used to count mutations that accumulated in a chronically infected patient.

416 We performed resampling test to estimate the statistical significance. Specifically, we  
417 randomly sampled 45 mutations from the 6,986 point mutations identified in a previous  
418 study from the 34,853 high-quality sequences of SARS-CoV-2 variants isolated from  
419 patients worldwide (Shan et al., 2021). This operation was repeated 100 times *in silico*.

#### 420 **Characterization of molecular spectra of mutations**

421 Complete genomic sequences of 23 bovine coronavirus (*Betacoronavirus 1*), 13 canine  
422 coronavirus (*Alphacoronavirus 1*), 54 feline coronavirus (*Alphacoronavirus 1*), 17  
423 murine hepatitis virus (*Murine coronavirus*), and 110 porcine deltacoronavirus  
424 (*Coronavirus HKU15*) were downloaded from National Center for Biotechnology  
425 Information (NCBI) Virus database (<https://www.ncbi.nlm.nih.gov/labs/virus/vssi/>)  
426 (Hatcher et al., 2017), querying the hosts as *Bos taurus* (cattle), *Canis lupus familiaris*  
427 (dogs), *Felis catus* (cats), *Mus musculus* (mice), and *Sus scrofa* (pigs), respectively  
428 (**Table S1**).

429 The virus genome sequences were aligned by MUSCLE, and the phylogenetic trees and  
430 ancestral sequences were reconstructed using FastML. Since the roots of these  
431 phylogenetic trees were not readily identified, we kept only external branches to ensure  
432 the correction direction of base substitutions (*e.g.*, C>U vs. U>C). For the sake of clarity,  
433 we showed the molecular spectra for five branches with the largest number of mutations  
434 for each coronavirus species in the main text. The full data set is available in **Table S1**.

435 We characterized the molecular spectra of mutations accumulated in chronically infected  
436 patients, in which single-nucleotide base substitutions that ever occurred during the  
437 monitored period were counted. We downloaded the genomic sequences of four variants  
438 (EPI\_ISL\_5803018, EPI\_ISL\_3730369, EPI\_ISL\_4003132, and EPI\_ISL\_6260720),

439 each from one of the other four VOCs (Alpha, Beta, Gamma, and Delta, respectively), to  
440 estimate the molecular spectra of mutations accumulated in VOCs.

#### 441 **Principal component analyses**

442 We performed principal component analysis (prcomp function in *R*) with the proportions  
443 of the 12 base-substitution types as the input, and then projected molecular spectra into a  
444 two-dimensional space according to the first two principal components. To define the  
445 borderlines of molecular spectra for each host species (*i.e.*, cattle, bats, dogs, cats, mice,  
446 pigs, or humans), we estimated the 95% confidence ellipses (stat\_ellipse option in *R*)  
447 from the molecular spectra of these host species. The spectra of pre- and post-outbreak  
448 Omicron mutations were further projected into the same two-dimensional space.

#### 449 **Comparison of pre-outbreak Omicron mutations with mutations detected in SARS-** 450 **COV-2 variants isolated from various mammalian hosts**

451 We downloaded from GISAID the genomic sequences of SARS-CoV-2 variants isolated  
452 from 18 mammalian hosts (**Table S2**): *Aonyx cinereus* (Asian small-clawed otter);  
453 *Arctictis binturong* (binturong); *Canis lupus familiaris* (dog); *Crocuta crocuta* (spotted  
454 hyena); *Felis catus* (cat); *Gorilla gorilla* (western gorilla); *Mus musculus* (mouse);  
455 *Mustela furo* (ferret); *Neovison vison* (American mink); *Odocoileus virginianus* (white-  
456 tailed deer); *Panthera leo* (lion), *Panthera tigris* (tiger); *Panthera uncia* (snow leopard);  
457 *Prionailurus bengalensis* (leopard cat); *Prionailurus viverrinus* (fishing cat);  
458 *Mesocricetus auratus* (golden hamster); *Chlorocebus sabaeus* (green monkey) and *Puma*  
459 *concolor* (puma). BLASTx was performed to identify ORF *S* in each variant, and  
460 mutations were identified at the same time. Three species (*Mesocricetus auratus*,  
461 *Chlorocebus sabaeus*, and *Puma concolor*) were discarded because they harbored less  
462 than three single amino acid mutations. Amino acid mutation data from three additional  
463 viruses isolated from mice were retrieved from three studies (Leist et al., 2020;  
464 Montagutelli et al., 2021; Sun et al., 2021).

#### 465 **Estimation of the binding affinity of RBD-ACE2 interaction by molecular docking**

466 We extracted three-dimensional structures of the spike RBD and human ACE2 from the  
467 crystal structure (PDB: 6M0J) reported in a previous study (Lan et al., 2020), and those  
468 of rodent ACE2 from the predicted models reported in a previous study (Lam et al.,  
469 2020). The structure models of the Omicron RBD and the RBD with five mutations  
470 (K417N, E484A, Q493R, Q498R, and N501Y) were generated using SWISS-MODEL  
471 (Waterhouse et al., 2018), and those of other RBD variants were generated using PyMOL  
472 “mutagenesis” (<https://pymol.org/>). The structure models of the RBD:ACE2 complex  
473 were generated by aligning against the reported complex structure of the corresponding  
474 species using PyMOL (Lam et al., 2020; Lan et al., 2020).

475 We performed molecular docking following previous studies (Lam et al., 2020;  
476 Rodrigues et al., 2020). Briefly, we refined the three-dimensional models using default  
477 refinement protocols, and then estimated the HADDOCK scores for each RBD:ACE2  
478 complex using HADDOCKv2.4 web server (van Zundert et al., 2016). Docking results of  
479 each RBD-ACE2 variant pair were clustered, and the average HADDOCK score of the  
480 top cluster was reported for the RBD:ACE2 complex.

481

## 482 **ACKNOWLEDGMENTS**

483 We thank Dr. Xionglei He from Sun Yat-sen University and Dr. Mingkun Li from  
484 Beijing Institute of Genomics CAS for discussion. We acknowledge the authors and  
485 laboratories for generating and submitting the sequences to GISAID Database on which  
486 this research is based. The list is detailed in Table S2. This work was supported by grants  
487 from the National Natural Science Foundation of China (31922014).

488

## 489 **SUPPLEMENTARY MATERIAL**

490 Supplementary material includes Supplemental Figures S1–4 and Supplemental Tables  
491 S1–2.

492

493 **AUTHOR CONTRIBUTIONS**

494 W.Q. designed the study; C.W., K.-J.S., W.W., and S.Z. performed data analyses; C.W.,  
495 K.-J.S., Q.H., and W.Q. wrote the manuscript.

496

497 **DECLARATION OF INTERESTS**

498 The authors declare that they have no competing interests.

499

500 **DATA AVAILABILITY**

501 All scripts used to analyze the data and to generate the figures are available at github  
502 ([https://github.com/ChangshuoWei/Omicron\\_origin](https://github.com/ChangshuoWei/Omicron_origin)) and Zenodo (DOI:  
503 10.5281/zenodo.5778199). All data that were used to support the findings of this study  
504 are available in the public databases.

## 505 REFERENCES

- 506 Ashkenazy, H., Penn, O., Doron-Faigenboim, A., Cohen, O., Cannarozzi, G., Zomer, O., Pupko, T.,  
507 2012. Fastml: A web server for probabilistic reconstruction of ancestral sequences.  
508 Nucleic Acids Res 40, W580-584.
- 509 Blanc, V., Davidson, N.O., 2010. Apobec-1-mediated rna editing. Wiley Interdiscip Rev Syst Biol  
510 Med 2, 594-602.
- 511 Callaway, E., 2021. Heavily mutated omicron variant puts scientists on alert. Nature.
- 512 Chandler, J.C., Bevins, S.N., Ellis, J.W., Linder, T.J., Tell, R.M., Jenkins-Moore, M., Root, J.J.,  
513 Leno, J.B., Robbe-Austerman, S., DeLiberto, T.J., *et al.*, 2021. Sars-cov-2 exposure in  
514 wild white-tailed deer (*odocoileus virginianus*). Proc Natl Acad Sci U S A 118.
- 515 De Maio, N., Walker, C.R., Turakhia, Y., Lanfear, R., Corbett-Detig, R., Goldman, N., 2021.  
516 Mutation rates and selection on synonymous mutations in sars-cov-2. Genome Biol Evol  
517 13.
- 518 Deng, S., Xing, K., He, X., 2021. Mutation signatures inform the natural host of sars-cov-2.  
519 National Science Review.
- 520 Edgar, R.C., 2004. Muscle: A multiple sequence alignment method with reduced time and space  
521 complexity. BMC Bioinformatics 5, 113.
- 522 Gu, H., Chen, Q., Yang, G., He, L., Fan, H., Deng, Y.Q., Wang, Y., Teng, Y., Zhao, Z., Cui, Y., *et al.*,  
523 2020. Adaptation of sars-cov-2 in balb/c mice for testing vaccine efficacy. Science 369,  
524 1603-1607.
- 525 Hadfield, J., Megill, C., Bell, S.M., Huddleston, J., Potter, B., Callender, C., Sagulenko, P., Bedford,  
526 T., Neher, R.A., 2018. Nextstrain: Real-time tracking of pathogen evolution.  
527 Bioinformatics 34, 4121-4123.
- 528 Harris, R.S., Dudley, J.P., 2015. Apobec and virus restriction. Virology 479-480, 131-145.
- 529 Hatcher, E.L., Zhdanov, S.A., Bao, Y., Blinkova, O., Nawrocki, E.P., Ostapchuck, Y., Schaffer,  
530 A.A., Brister, J.R., 2017. Virus variation resource - improved response to emergent viral  
531 outbreaks. Nucleic Acids Res 45, D482-D490.
- 532 Huang, K., Zhang, Y., Hui, X., Zhao, Y., Gong, W., Wang, T., Zhang, S., Yang, Y., Deng, F., Zhang,  
533 Q., *et al.*, 2021. Q493k and q498h substitutions in spike promote adaptation of sars-cov-  
534 2 in mice. EBioMedicine 67, 103381.
- 535 Huang, Y., Yang, C., Xu, X.F., Xu, W., Liu, S.W., 2020. Structural and functional properties of sars-  
536 cov-2 spike protein: Potential antiviral drug development for covid-19. Acta Pharmacol  
537 Sin 41, 1141-1149.
- 538 Kastiris, P.L., Bonvin, A.M., 2010. Are scoring functions in protein-protein docking ready to  
539 predict interactomes? Clues from a novel binding affinity benchmark. J Proteome Res 9,  
540 2216-2225.
- 541 Kemp, S.A., Collier, D.A., Datir, R.P., Ferreira, I., Gayed, S., Jahun, A., Hosmillo, M., Rees-Spear,  
542 C., Mlcochova, P., Lumb, I.U., *et al.*, 2021. Sars-cov-2 evolution during treatment of  
543 chronic infection. Nature 592, 277-282.
- 544 Kim, D., Lee, J.Y., Yang, J.S., Kim, J.W., Kim, V.N., Chang, H., 2020. The architecture of sars-cov-2  
545 transcriptome. Cell 181, 914-921 e910.
- 546 Kong, Q., Lin, C.L., 2010. Oxidative damage to rna: Mechanisms, consequences, and diseases. Cell  
547 Mol Life Sci 67, 1817-1829.
- 548 Kumar, S., Stecher, G., Suleski, M., Hedges, S.B., 2017. Timetree: A resource for timelines,  
549 timetrees, and divergence times. Mol Biol Evol 34, 1812-1819.
- 550 Kupferschmidt, K., 2021. Where did 'weird' omicron come from? Science 374, 1179.

- 551 Lam, S.D., Bordin, N., Waman, V.P., Scholes, H.M., Ashford, P., Sen, N., van Dorp, L., Rauer, C.,  
552 Dawson, N.L., Pang, C.S.M., *et al.*, 2020. Sars-cov-2 spike protein predicted to form  
553 complexes with host receptor protein orthologues from a broad range of mammals. *Sci*  
554 *Rep* 10, 16471.
- 555 Lan, J., Ge, J., Yu, J., Shan, S., Zhou, H., Fan, S., Zhang, Q., Shi, X., Wang, Q., Zhang, L., *et al.*, 2020.  
556 Structure of the sars-cov-2 spike receptor-binding domain bound to the ace2 receptor.  
557 *Nature* 581, 215-220.
- 558 Leist, S.R., Dinno, K.H., 3rd, Schafer, A., Tse, L.V., Okuda, K., Hou, Y.J., West, A., Edwards, C.E.,  
559 Sanders, W., Fritch, E.J., *et al.*, 2020. A mouse-adapted sars-cov-2 induces acute lung  
560 injury and mortality in standard laboratory mice. *Cell* 183, 1070-1085 e1012.
- 561 Li, Q., Nie, J., Wu, J., Zhang, L., Ding, R., Wang, H., Zhang, Y., Li, T., Liu, S., Zhang, M., *et al.*, 2021.  
562 Sars-cov-2 501y.V2 variants lack higher infectivity but do have immune escape. *Cell* 184,  
563 2362-2371 e2369.
- 564 Li, Z., Wu, J., Deleo, C.J., 2006. Rna damage and surveillance under oxidative stress. *IUBMB Life*  
565 58, 581-588.
- 566 Martinez-Flores, D., Zepeda-Cervantes, J., Cruz-Resendiz, A., Aguirre-Sampieri, S., Sampieri,  
567 A., Vaca, L., 2021. Sars-cov-2 vaccines based on the spike glycoprotein and implications  
568 of new viral variants. *Front Immunol* 12, 701501.
- 569 Meng, B., Kemp, S.A., Papa, G., Datir, R., Ferreira, I., Marelli, S., Harvey, W.T., Lytras, S.,  
570 Mohamed, A., Gallo, G., *et al.*, 2021. Recurrent emergence of sars-cov-2 spike deletion  
571 h69/v70 and its role in the alpha variant b.1.1.7. *Cell Rep* 35, 109292.
- 572 Montagutelli, X., Prot, M., Jouvion, G., Levillayer, L., Conquet, L., Reyes-Gomez, E., Donati, F.,  
573 Albert, M., van der Werf, S., Jaubert, J., *et al.*, 2021. A mouse-adapted sars-cov-2 strain  
574 replicating in standard laboratory mice. *bioRxiv*, 2021.2007.2010.451880.
- 575 Nelson, G., Buzko, O., Spilman, P., Niazi, K., Rabizadeh, S., Soon-Shiong, P., 2021. Molecular  
576 dynamic simulation reveals e484k mutation enhances spike rbd-ace2 affinity and the  
577 combination of e484k, k417n and n501y mutations (501y.V2 variant) induces  
578 conformational change greater than n501y mutant alone, potentially resulting in an  
579 escape mutant. *bioRxiv*, 2021.2001.2013.426558.
- 580 Oude Munnink, B.B., Sikkema, R.S., Nieuwenhuijse, D.F., Molenaar, R.J., Munger, E.,  
581 Molenkamp, R., van der Spek, A., Tolsma, P., Rietveld, A., Brouwer, M., *et al.*, 2021.  
582 Transmission of sars-cov-2 on mink farms between humans and mink and back to  
583 humans. *Science* 371, 172-177.
- 584 Panchin, A.Y., Panchin, Y.V., 2020. Excessive g-u transversions in novel allele variants in sars-cov-  
585 2 genomes. *PeerJ* 8, e9648.
- 586 Ren, W., Zhu, Y., Wang, Y., Shi, H., Yu, Y., Hu, G., Feng, F., Zhao, X., Lan, J., Wu, J., *et al.*, 2021.  
587 Comparative analysis reveals the species-specific genetic determinants of ace2 required  
588 for sars-cov-2 entry. *PLoS Pathog* 17, e1009392.
- 589 Rodrigues, J., Barrera-Vilarmau, S., J, M.C.T., Sorokina, M., Seckel, E., Kastiris, P.L., Levitt, M.,  
590 2020. Insights on cross-species transmission of sars-cov-2 from structural modeling.  
591 *PLoS Comput Biol* 16, e1008449.
- 592 Shan, K.J., Wei, C., Wang, Y., Huan, Q., Qian, W., 2021. Host-specific asymmetric accumulation of  
593 mutation types reveals that the origin of sars-cov-2 is consistent with a natural process.  
594 *The Innovation* 2, 100159.
- 595 Shu, Y., McCauley, J., 2017. Gisaid: Global initiative on sharing all influenza data - from vision to  
596 reality. *Euro Surveill* 22, 30494.

- 597 Smyth, D.S., Trujillo, M., Gregory, D.A., Cheung, K., Gao, A., Graham, M., Guan, Y.,  
598 Guldenpfennig, C., Hoxie, I., Kannyo, S., *et al.*, 2021. Tracking cryptic sars-cov-2 lineages  
599 detected in nyc wastewater. medRxiv, 2021.2007.2026.21261142.
- 600 Sun, S., Gu, H., Cao, L., Chen, Q., Ye, Q., Yang, G., Li, R.T., Fan, H., Deng, Y.Q., Song, X., *et al.*,  
601 2021. Characterization and structural basis of a lethal mouse-adapted sars-cov-2. *Nat*  
602 *Commun* 12, 5654.
- 603 Truong, T.T., Ryutov, A., Pandey, U., Yee, R., Goldberg, L., Bhojwani, D., Aguayo-Hiraldo, P.,  
604 Pinsky, B.A., Pekosz, A., Shen, L., *et al.*, 2021. Increased viral variants in children and  
605 young adults with impaired humoral immunity and persistent sars-cov-2 infection: A  
606 consecutive case series. *EBioMedicine* 67, 103355.
- 607 van Zundert, G.C.P., Rodrigues, J., Trellet, M., Schmitz, C., Kastiris, P.L., Karaca, E., Melquiond,  
608 A.S.J., van Dijk, M., de Vries, S.J., Bonvin, A., 2016. The haddock2.2 web server: User-  
609 friendly integrative modeling of biomolecular complexes. *J Mol Biol* 428, 720-725.
- 610 Venkatakrisnan, A., Anand, P., Lenehan, P., Suratekar, R., Raghunathan, B., Niesen,  
611 M.J., Soundararajan, V., 2021. Omicron variant of sars-cov-2 harbors a unique insertion  
612 mutation of putative viral or human genomic origin. *OSF Preprints*.
- 613 Waterhouse, A., Bertoni, M., Bienert, S., Studer, G., Tauriello, G., Gumienny, R., Heer, F.T., de  
614 Beer, T.A.P., Rempfer, C., Bordoli, L., *et al.*, 2018. Swiss-model: Homology modelling of  
615 protein structures and complexes. *Nucleic Acids Res* 46, W296-W303.
- 616 Wei, C., Chen, Y.M., Chen, Y., Qian, W., 2021. The missing expression level-evolutionary rate  
617 anticorrelation in viruses does not support protein function as a main constraint on  
618 sequence evolution. *Genome Biol Evol* 13, evab049.
- 619 Wong, L.Y.R., Zheng, J., Wilhelmsen, K., Li, K., Ortiz, M.E., Schnicker, N.J., Pezzulo, A.A.,  
620 Szachowicz, P.J., Klumpp, K., Aswad, F., *et al.*, 2021. Eicosanoid signaling as a therapeutic  
621 target in middle-aged mice with severe covid-19. *bioRxiv*.
- 622 Wu, F., Zhao, S., Yu, B., Chen, Y.M., Wang, W., Song, Z.G., Hu, Y., Tao, Z.W., Tian, J.H., Pei, Y.Y., *et*  
623 *al.*, 2020a. A new coronavirus associated with human respiratory disease in china.  
624 *Nature* 579, 265-269.
- 625 Wu, S., Zhong, G., Zhang, J., Shuai, L., Zhang, Z., Wen, Z., Wang, B., Zhao, Z., Song, X., Chen, Y., *et*  
626 *al.*, 2020b. A single dose of an adenovirus-vectored vaccine provides protection against  
627 sars-cov-2 challenge. *Nat Commun* 11, 4081.
- 628 Zhang, Y., Huang, K., Wang, T., Deng, F., Gong, W., Hui, X., Zhao, Y., He, X., Li, C., Zhang, Q., *et al.*,  
629 2021. Sars-cov-2 rapidly adapts in aged balb/c mice and induces typical pneumonia. *J*  
630 *Viol.*
- 631 Zhou, P., Yang, X.L., Wang, X.G., Hu, B., Zhang, L., Zhang, W., Si, H.R., Zhu, Y., Li, B., Huang, C.L.,  
632 *et al.*, 2020. A pneumonia outbreak associated with a new coronavirus of probable bat  
633 origin. *Nature* 579, 270-273.

634

635



636 **FIGURES**

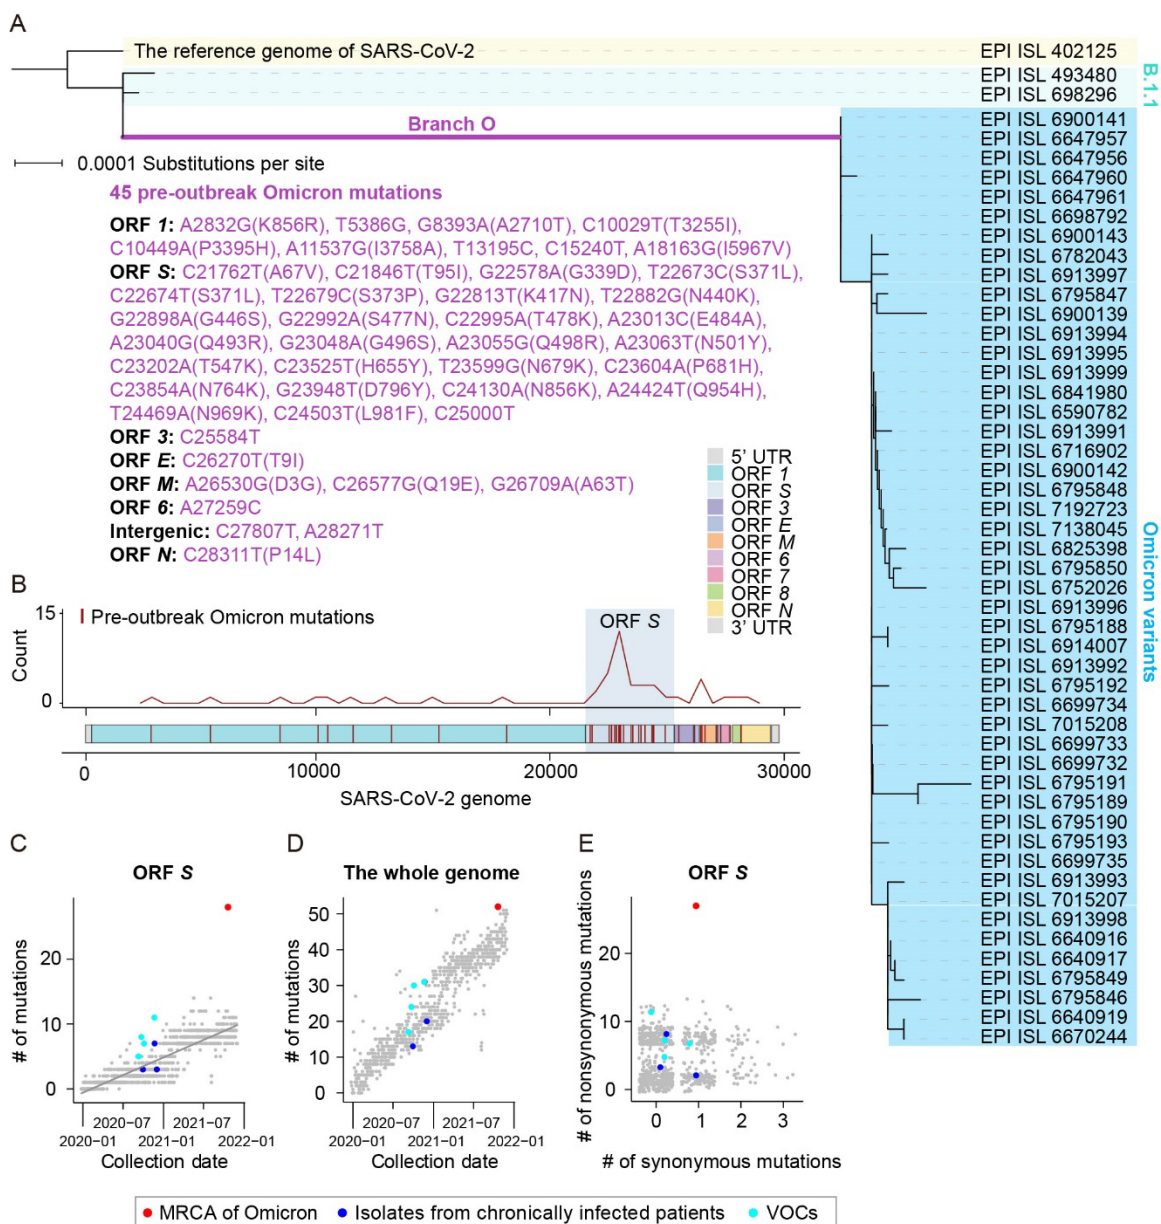

637

638 **Fig. 1. The characterization of pre-outbreak Omicron mutations.**

639 **A.** The phylogenetic tree of Omicron variants, including the reference genome of SARS-  
 640 CoV-2 (EPI\_ISL\_402125), two B.1.1 variants, and 48 Omicron variants. A total of 45  
 641 pre-outbreak Omicron point mutations in the long branch leading to the MRCA of  
 642 Omicron (Branch O, labeled in purple) in the phylogenetic tree are grouped according to  
 643 ORFs.



644 **B.** The distribution of pre-outbreak Omicron mutations across the SARS-CoV-2 genome.

645 The curve indicates the density of mutations. UTR stands for the untranslated region.

646 **C.** Number of mutations that accumulated in ORF *S* of the MRCA of current Omicron

647 variants (red), the other four VOCs (*i.e.*, Alpha, Beta, Gamma, and Delta; cyan), and

648 three SARS-CoV-2 isolates from chronically infected patients (blue), against the date of

649 sample collection. SARS-CoV-2 variants randomly sampled (one variant per day) are

650 shown in grey, and the grey line represents their linear regression.

651 **D.** Similar to (C), for the whole genome.

652 **E.** A scatterplot shows the numbers of synonymous and nonsynonymous mutations in

653 ORF *S* (jittered in order to reduce overplotting).

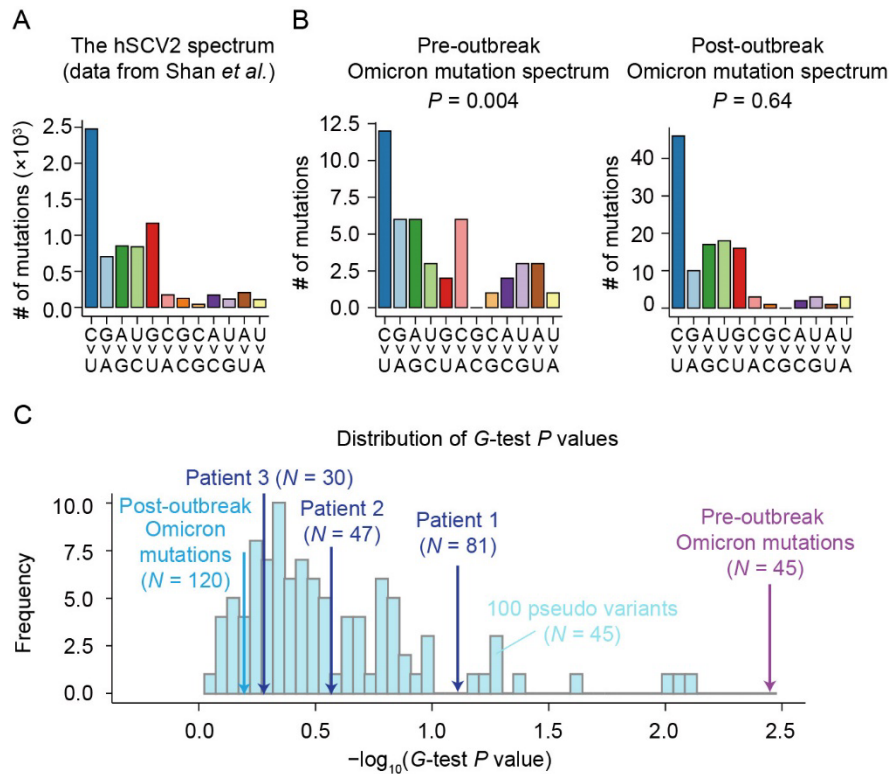

654

655 **Fig. 2. Comparison of the molecular spectrum of pre-outbreak Omicron mutations**  
 656 **and spectra of mutations known to accumulate in humans.**

657 **A.** The molecular spectrum of viral mutations that accumulated in humans (the hSCV2  
 658 spectrum).

659 **B.** The molecular spectra of pre- and post-outbreak Omicron mutations.  $P$  values were  
 660 given by  $G$ -test to test whether a molecular spectrum was significantly different from the  
 661 hSCV2 spectrum.

662 **C.** The distribution of  $P$  values (given by  $G$ -test) of 100 pseudo samples that were down  
 663 sampled from the hSCV2 spectrum. The number of mutations ( $N$ ) of each pseudo sample  
 664 was equal to 45. The molecular spectra of SARS-CoV-2 isolates from three chronically  
 665 infected patients were also labeled. SARS-CoV-2 data of patient 1 were retrieved from  
 666 Kemp *et al.* (2021) and those of patients 2 and 3 were retrieved from Truong *et al.*  
 667 (2021).

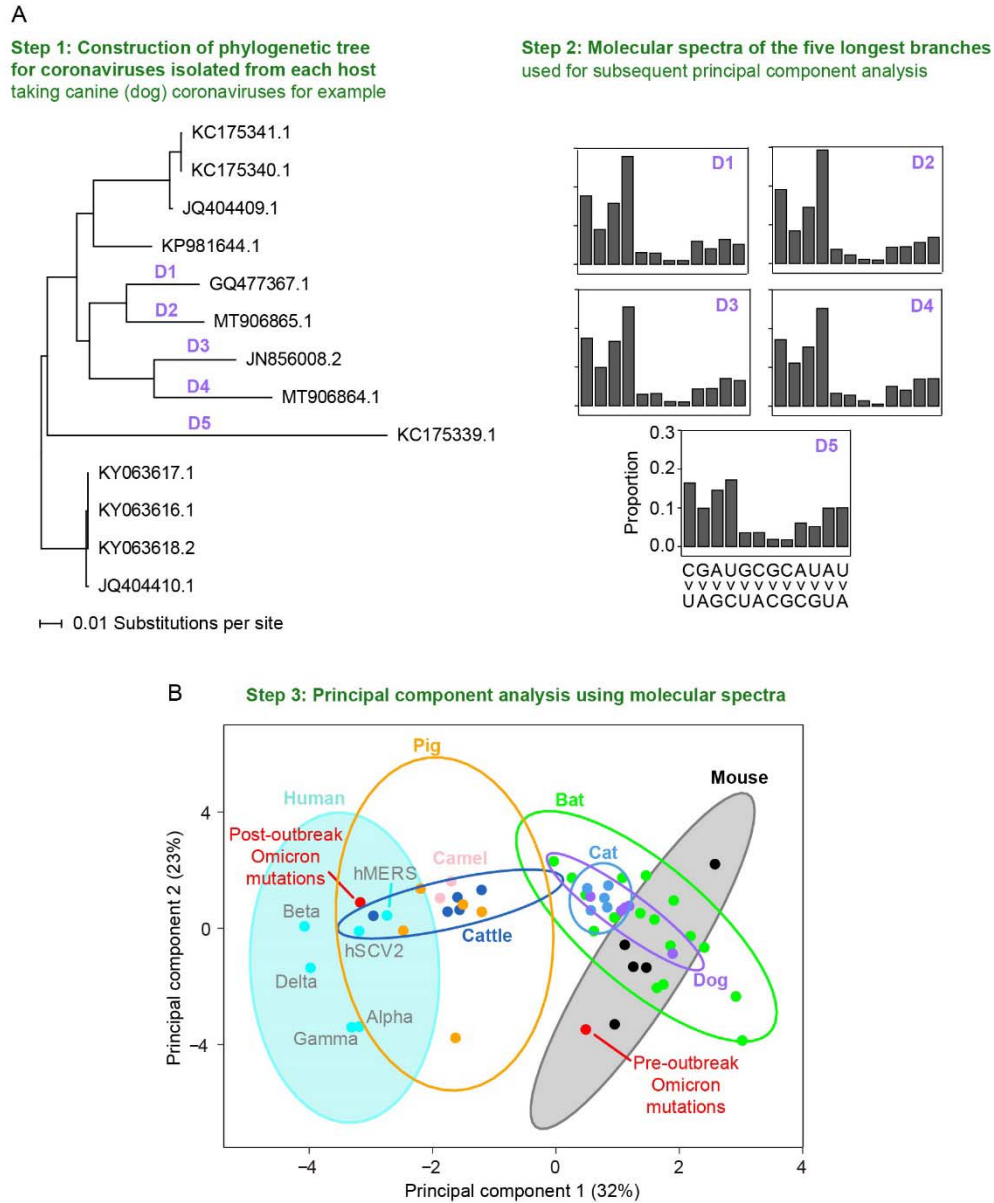

668

669 **Fig. 3. The similarity in molecular spectra between Omicron and coronaviruses**  
670 **isolated from various mammalian species.**

671 **A.** A schematic shows the workflow for analyzing the similarity in molecular spectra  
672 across various hosts, taking variants in dogs as an example.

673 **B.** The principal component analysis plot depicts the molecular spectra of virus mutations  
674 that accumulated in humans and various host species. Dots were colored according to the  
675 corresponding host species. The 95% confidence ellipses are shown for each host species.

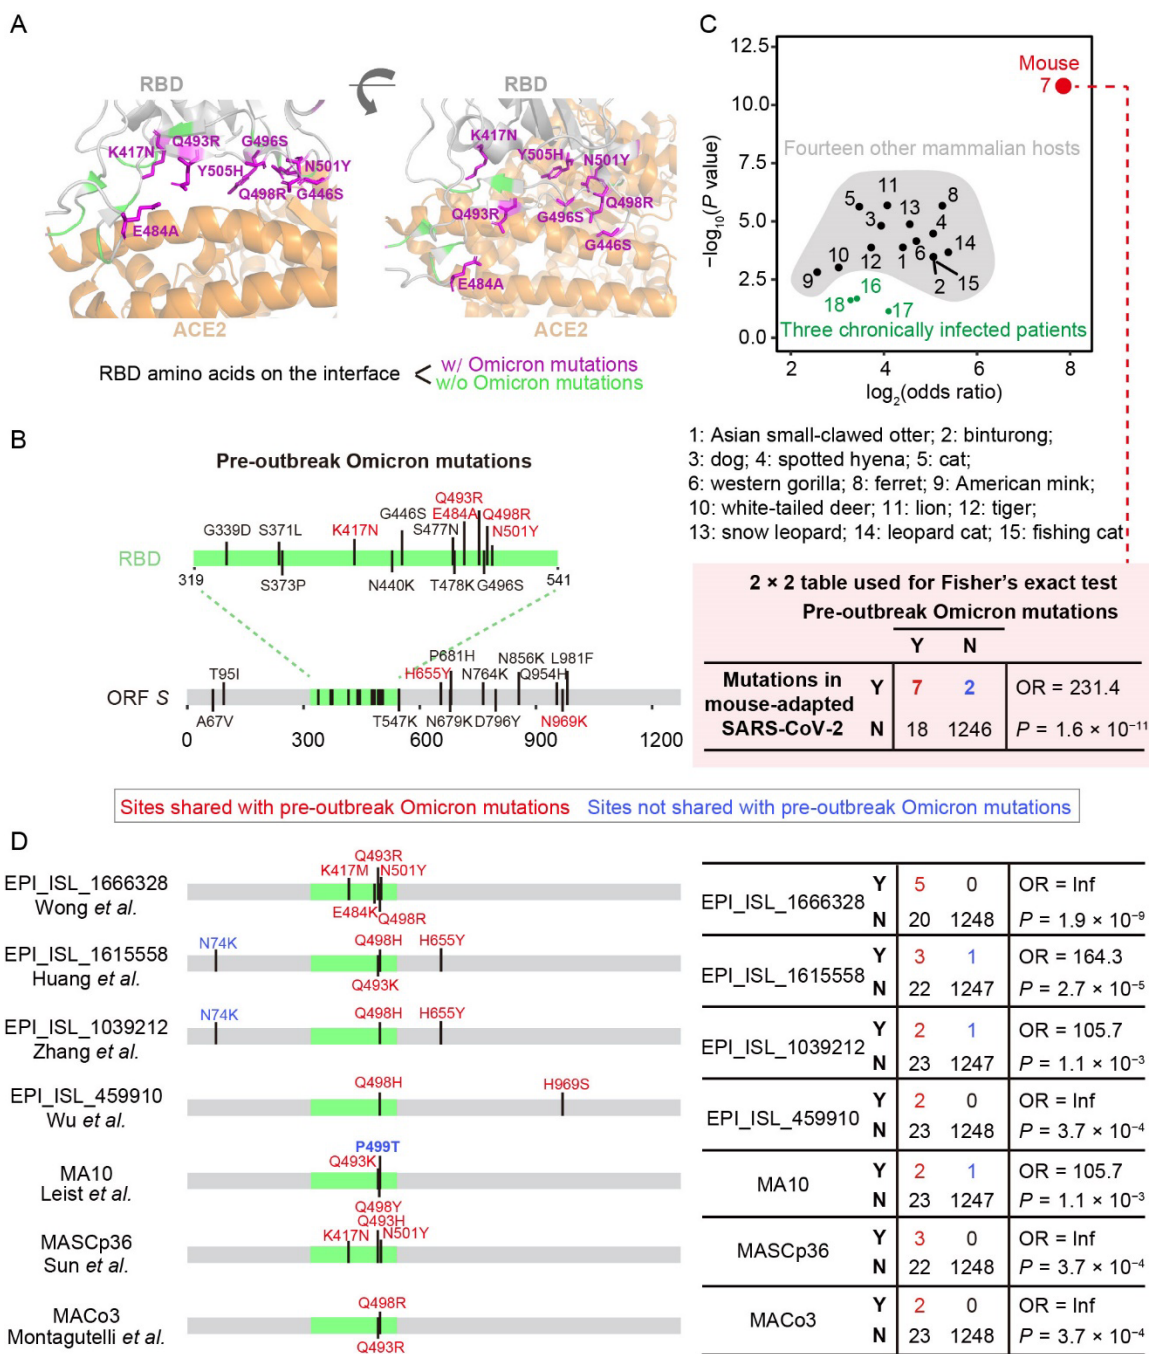

676

677 **Fig. 4. The similarity in the spike protein sequence between Omicron and SARS-**  
678 **CoV-2 variants isolated from various hosts.**

679 **A.** The structure of the interface between SARS-CoV-2 spike protein and human ACE2,  
680 from the crystal structure of the spike:ACE2 (human) complex (PDB: 6M0J). RBD  
681 residues on the interface (defined within 5 Å distance) were colored.

682 **B.** The amino acid mutations in the spike protein in the MRCA of Omicron variants.

683 **C.** The statistical assessment on the overlapping in mutated positions between Omicron  
684 and SARS-CoV-2 variants using Fisher's exact test. The  $2 \times 2$  contingency table for mice  
685 is shown. OR stands for the odds ratio.

686 **D.** Comparison between pre-outbreak Omicron mutations and mutations detected in  
687 seven SARS-COV-2 variants isolated from mice, in the spike protein. RBD of spike  
688 protein was colored green.

689

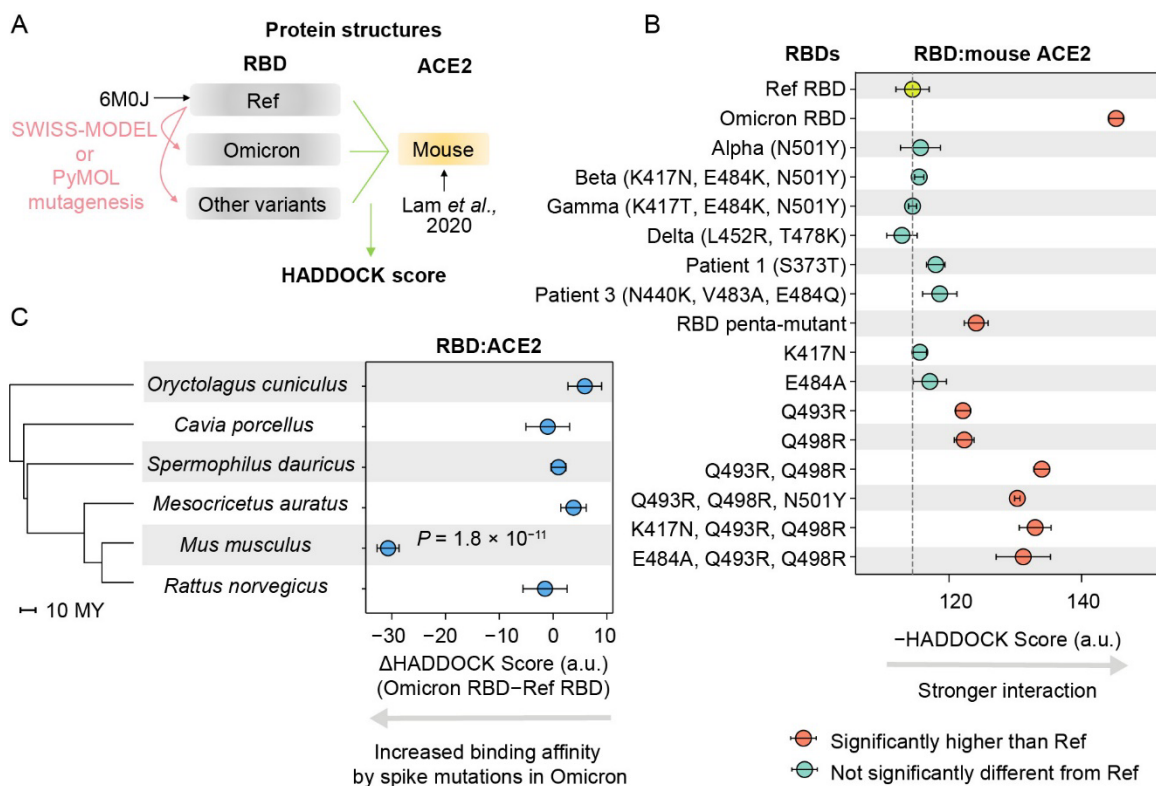

690

691 **Fig. 5. Predicted binding affinities between RBD variants and ACE2.**

692 **A.** A schematic shows the workflow to estimate the HADDOCK scores between RBD  
693 variants and mouse ACE2.

694 **B.** The HADDOCK scores for various RBD variants and mouse ACE2. The error bars  
695 represent standard errors. Penta-mutant of RBD harbored five mutations (K417N, E484A,  
696 Q493R, Q498R, and N501Y). Patient 2 who did not harbor any amino acid mutations in  
697 RBD was not shown.

698 **C.** The  $\Delta$ HADDOCK scores for five rodent species and the European rabbit. *P* values  
699 were given by two-tailed *t*-tests. Only *P* values <0.05 are labeled. The phylogenetic tree  
700 was constructed using TIMETREE, in the unit of million years (MY).

701



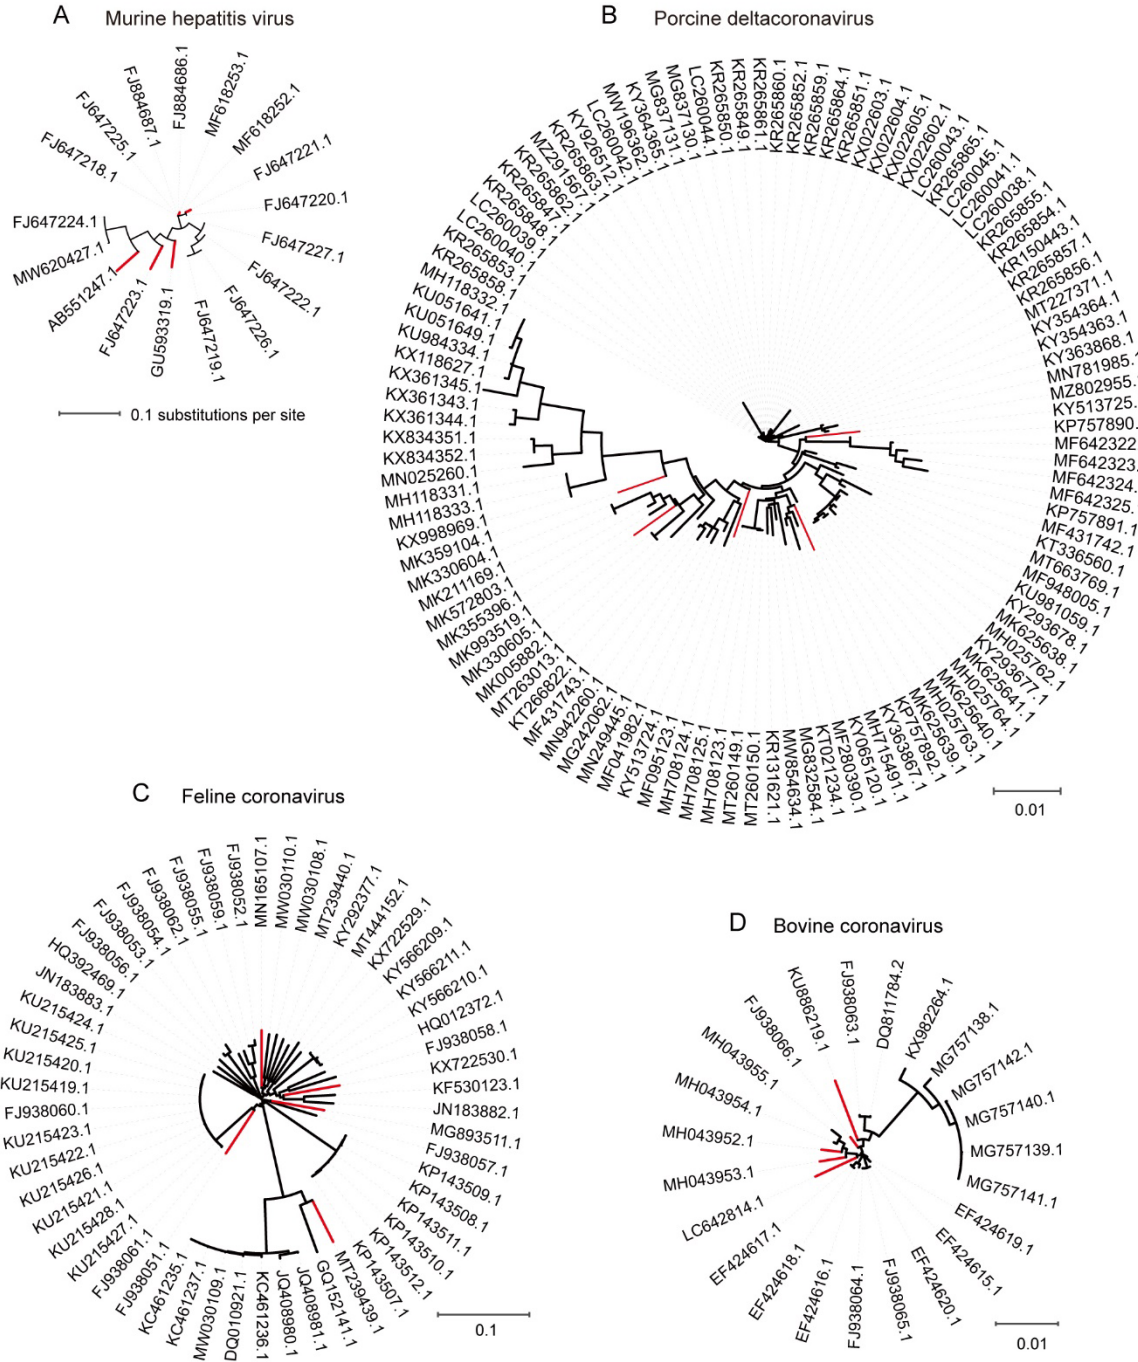

702

703 **Fig. S1. The phylogenetic trees of four coronavirus species.**

704 The five external branches with the largest number of accumulated mutations were

705 colored red, and were used in the principal component analysis.

706

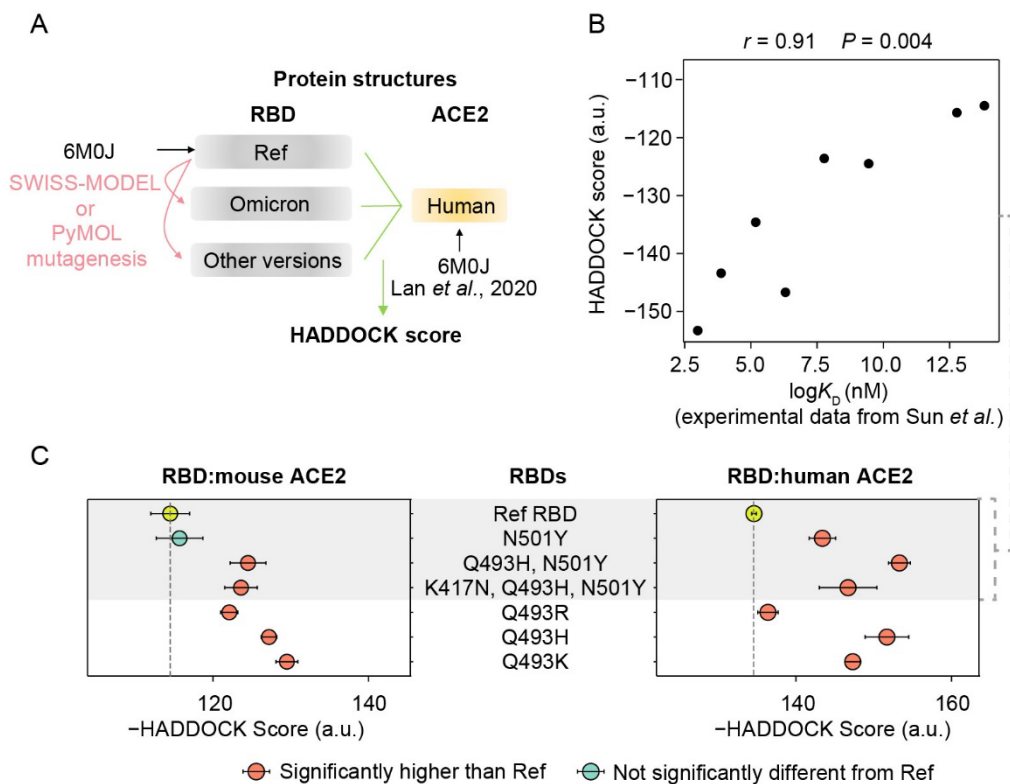



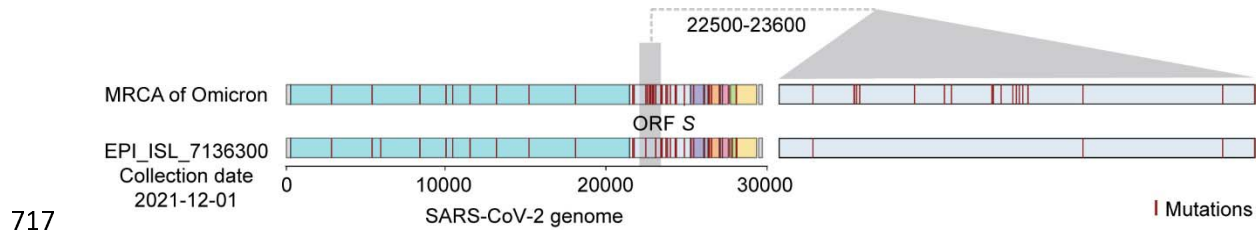

718 **Fig. S3. The distribution of mutations in a potential intermediate of the current**  
719 **Omicron variants.**

720 Red lines represent the positions of point mutations (relative to the B.1.1 lineage). The  
721 genomic regions were colored according to ORFs as in **Fig. 1B**.

722

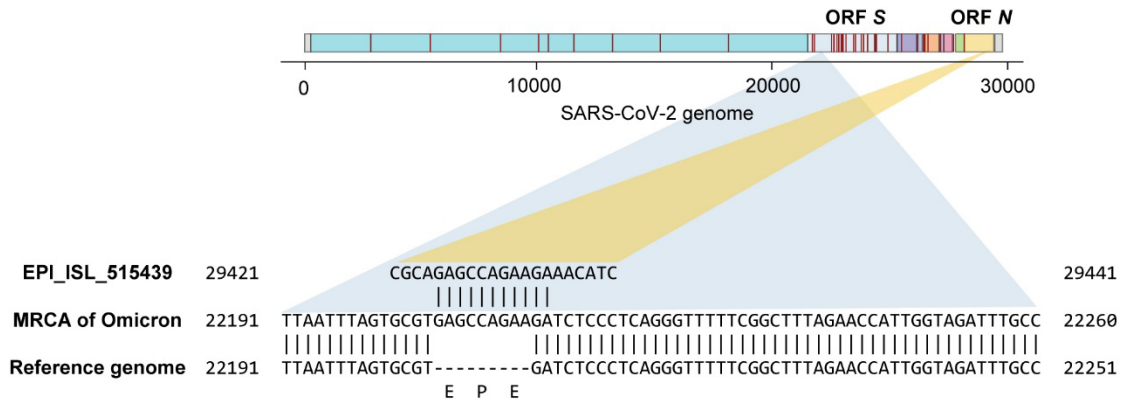

724 **Fig. S4. A potential explanation for the “EPE insertion” in the spike protein of**  
 725 **Omicron**

726 Red lines represent the positions of point mutations (relative to the B.1.1 lineage). The  
 727 genomic regions were colored according to ORFs as in **Fig. 1B**. The “EPE insertion”  
 728 related regions were shown at the nucleotide resolution. The SARS-CoV-2 variant  
 729 (EPI\_ISL\_515439) collected by the Nevada State Public Health Laboratory on May 19<sup>th</sup>,  
 730 2020 was used as an example to illustrate a potential source sequence of the insertion.
